# Supplementary material
Source: MDPI journal article supplement (https://www.mdpi.com/search?q=molbank-2021-M1273)
Supplement: s002 [file molbank-2021-M1273-s002.inchi]

InChI=1S/C15H13N5S2/c16-14(21)20-17-9-10-5-7-11(8-6-10)22-15-18-12-3-1-2-4-13(12)19-15/h1-9H,(H,18,19)(H3,16,20,21)/b17-9-
AuxInfo=1/1/N:1,2,6,3,13,15,12,16,17,14,11,5,4,20,8,21,18,9,7,19,22,10/E:(1,2)(3,4)(5,6)(7,8)(12,13)(18,19)/rA:23CCCCCCNCNSCCCCCCCNNCNSH/rB:d1;s2;d3;s4;s1d5;s4;s7;s5d8;s8;s10;d11;s12;d13;s14;s11d15;s14;d-17;s18;s19;s20;d20;s17;/rC:-7.1385,-1.7942,0;-7.1385,-3.3342,0;-5.805,-4.1042,0;-4.4712,-3.3342,0;-4.4712,-1.7942,0;-5.805,-1.0242,0;-3.0066,-3.8101,0;-2.1015,-2.5642,0;-3.0066,-1.3182,0;-.5615,-2.5642,0;.2085,-1.2305,0;-.5615,.1032,0;.2085,1.4368,0;1.7485,1.4368,0;2.5185,.1032,0;1.7485,-1.2305,0;2.5185,2.7705,0;4.0585,2.7705,0;4.8285,1.4368,0;6.3685,1.4368,0;7.1385,.1032,0;7.1385,2.7705,0;1.7485,4.1042,0;
